# Supplementary material
Source: PubMed Central journal article supplement (PMC9978939)

Figure S1

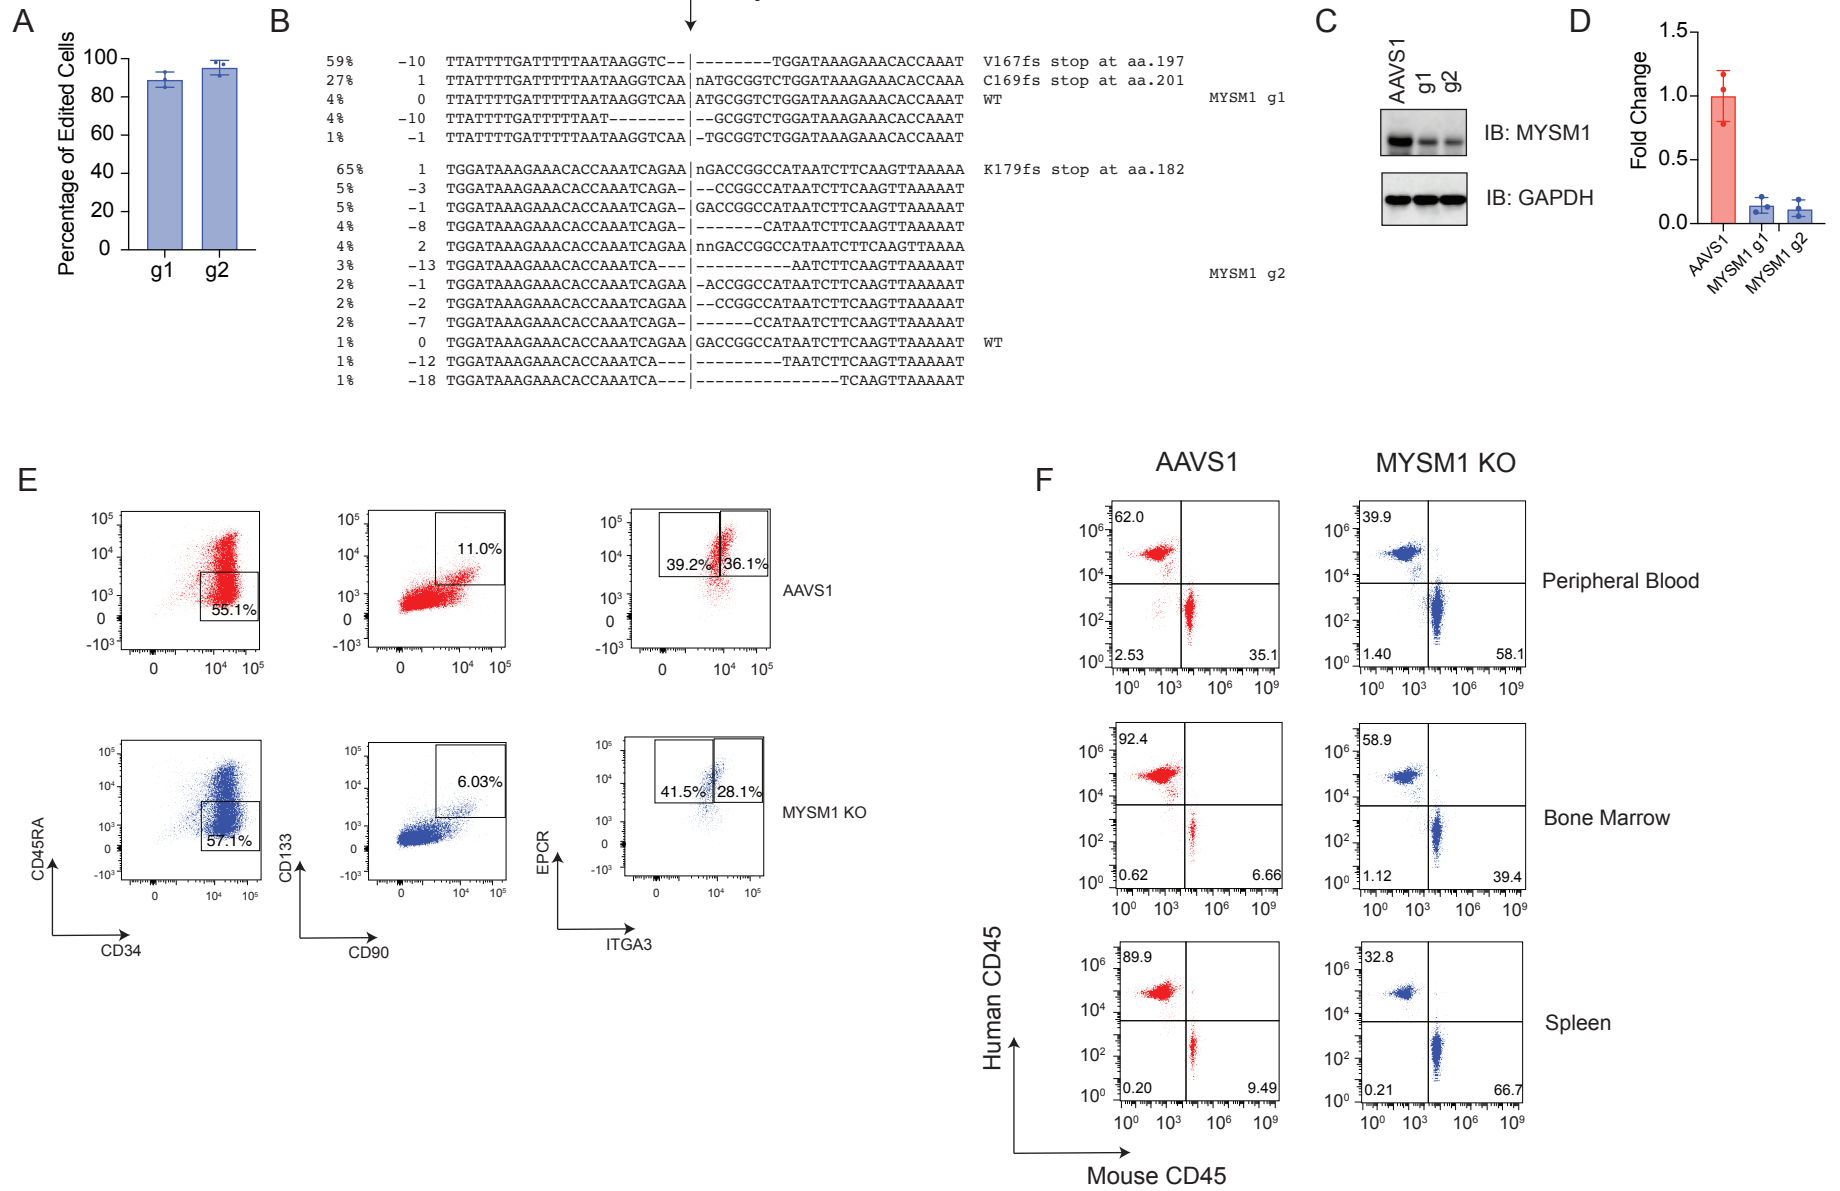

Supplement: NIHMS1866546-supplement-10.pdf [file NIHMS1866546-supplement-10.pdf]

Figure S2

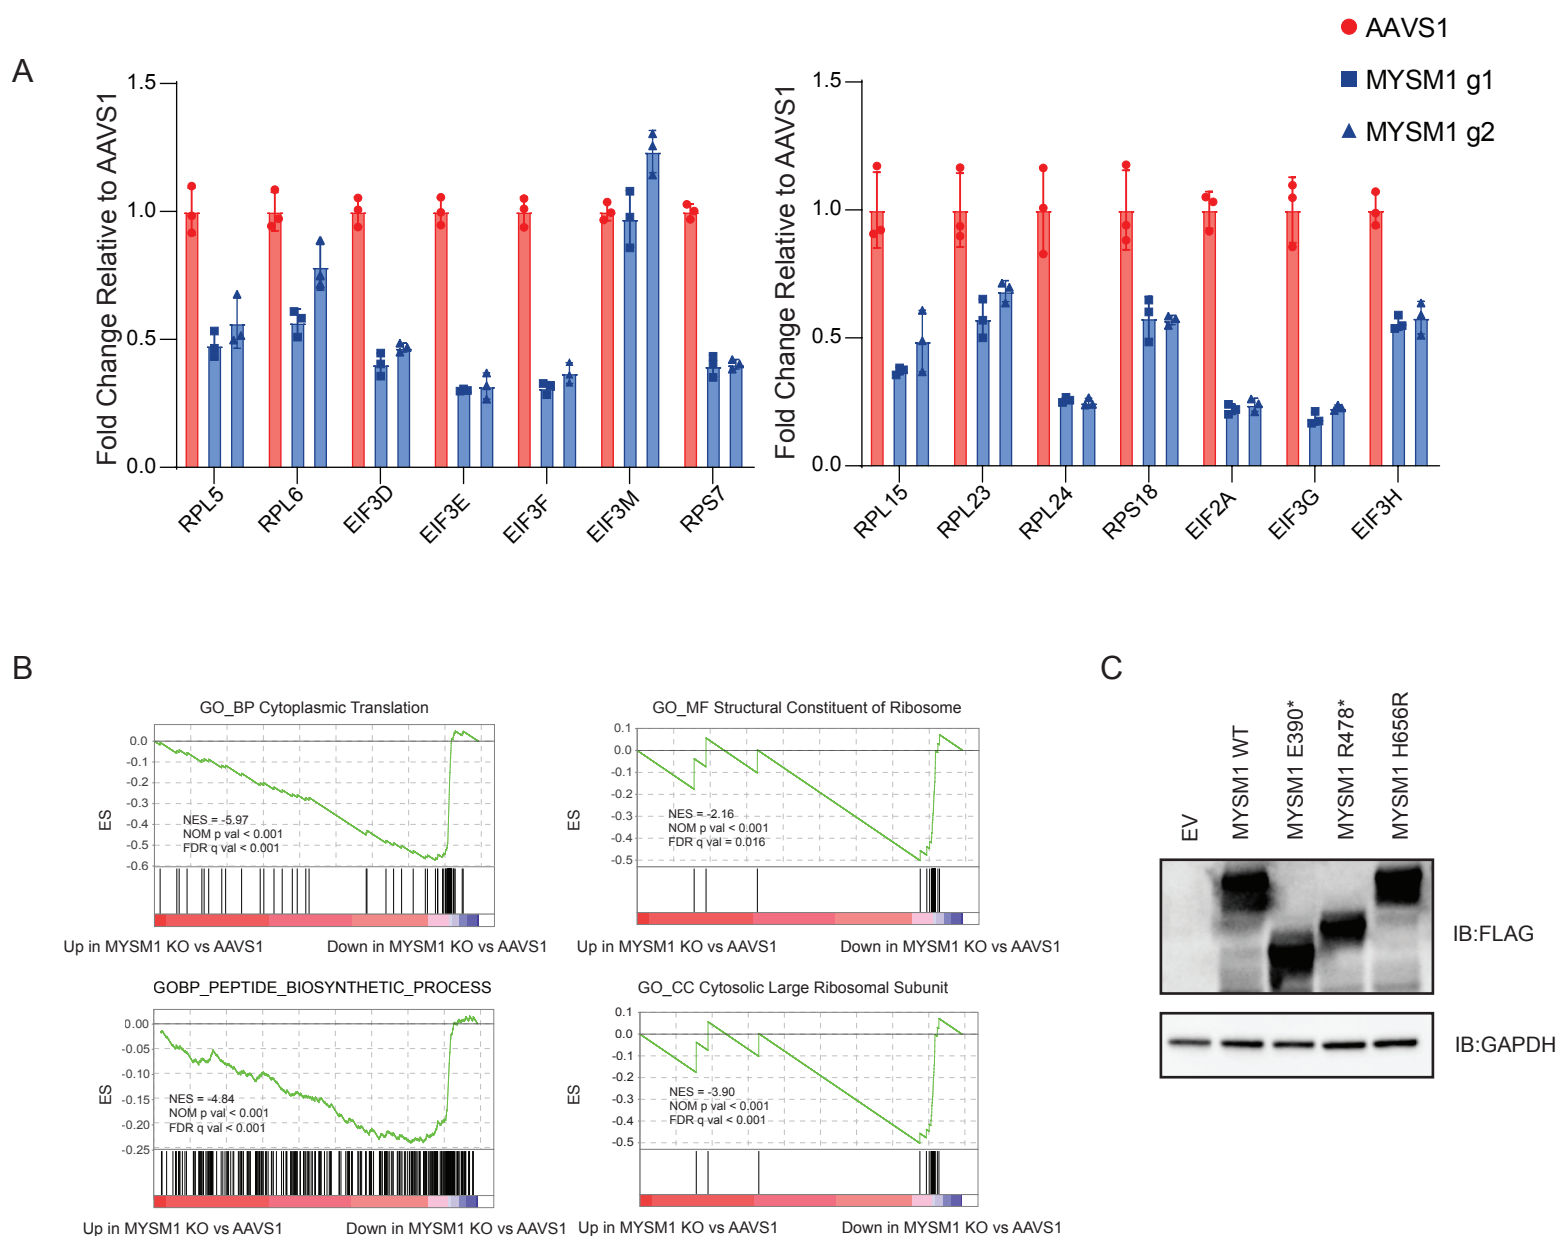

Supplement: NIHMS1866546-supplement-11.pdf [file NIHMS1866546-supplement-11.pdf]

Figure S3

A

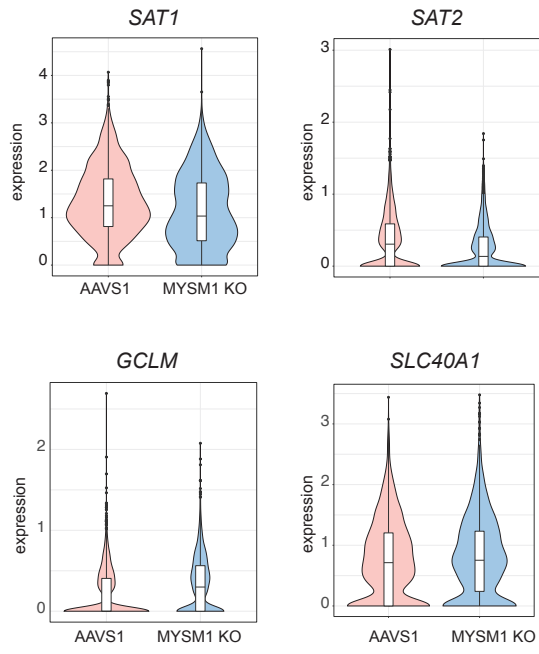

B

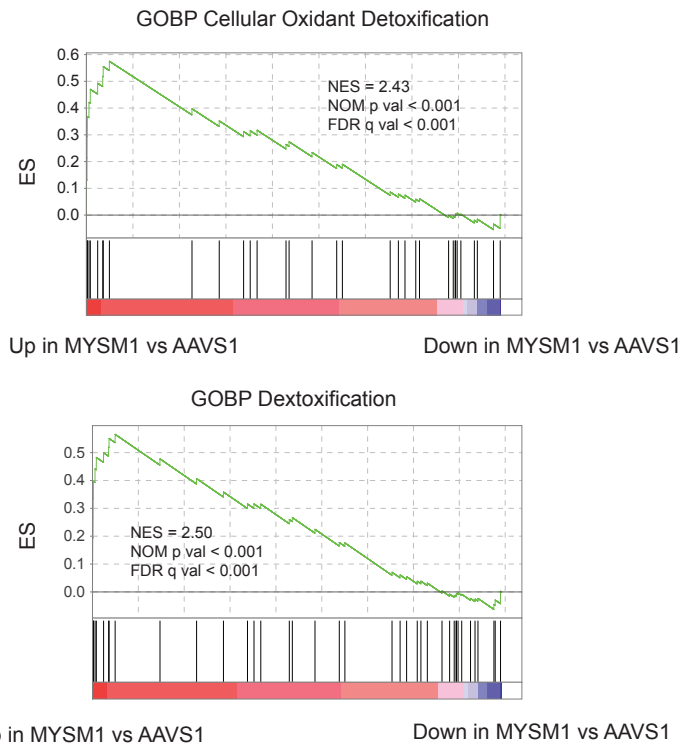

Supplement: NIHMS1866546-supplement-12.pdf [file NIHMS1866546-supplement-12.pdf]

Figure S4

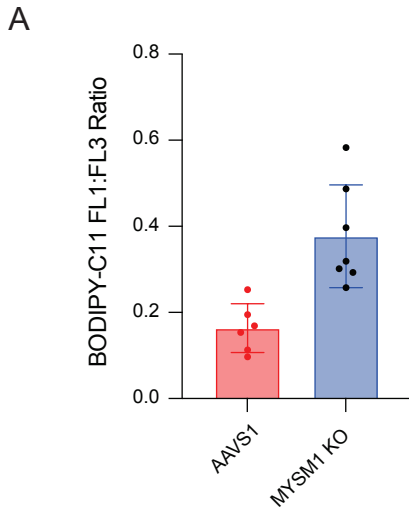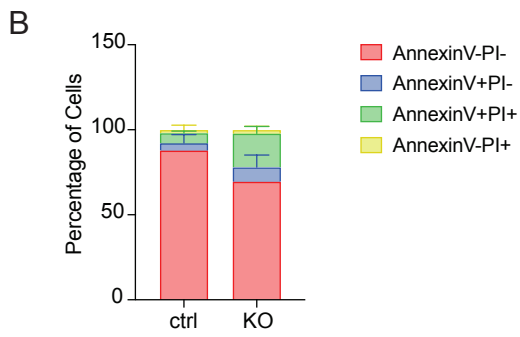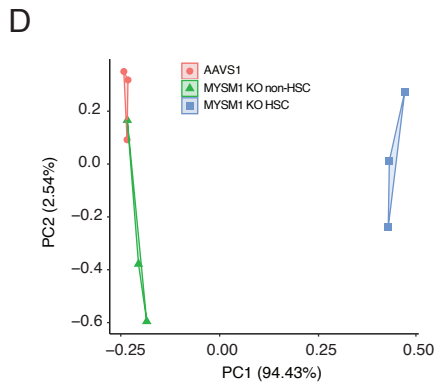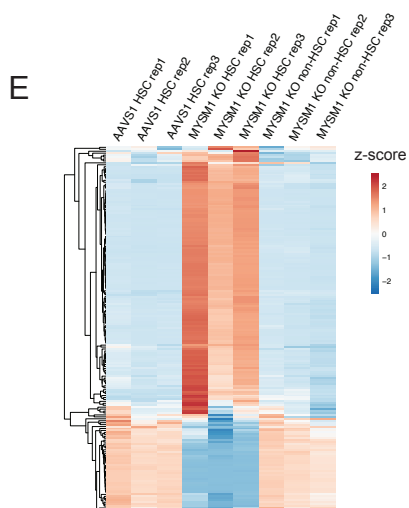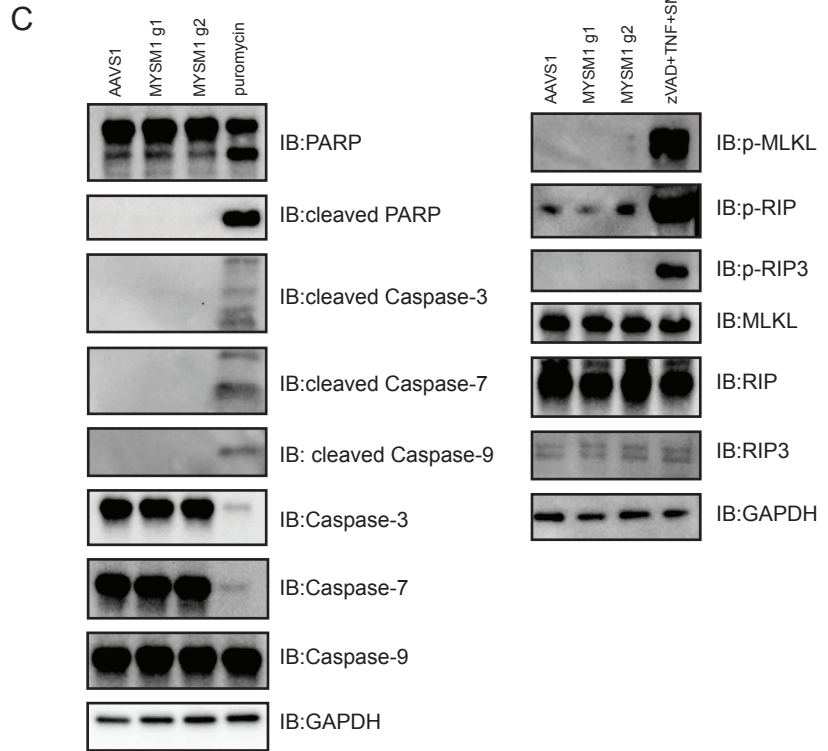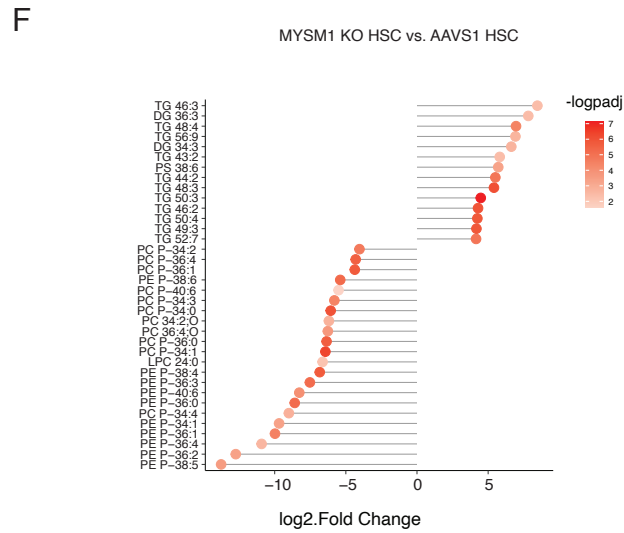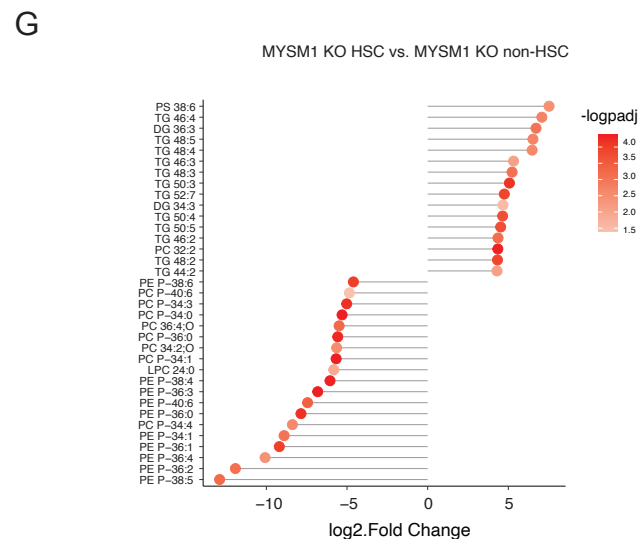

Supplement: NIHMS1866546-supplement-13.pdf [file NIHMS1866546-supplement-13.pdf]

Figure S6

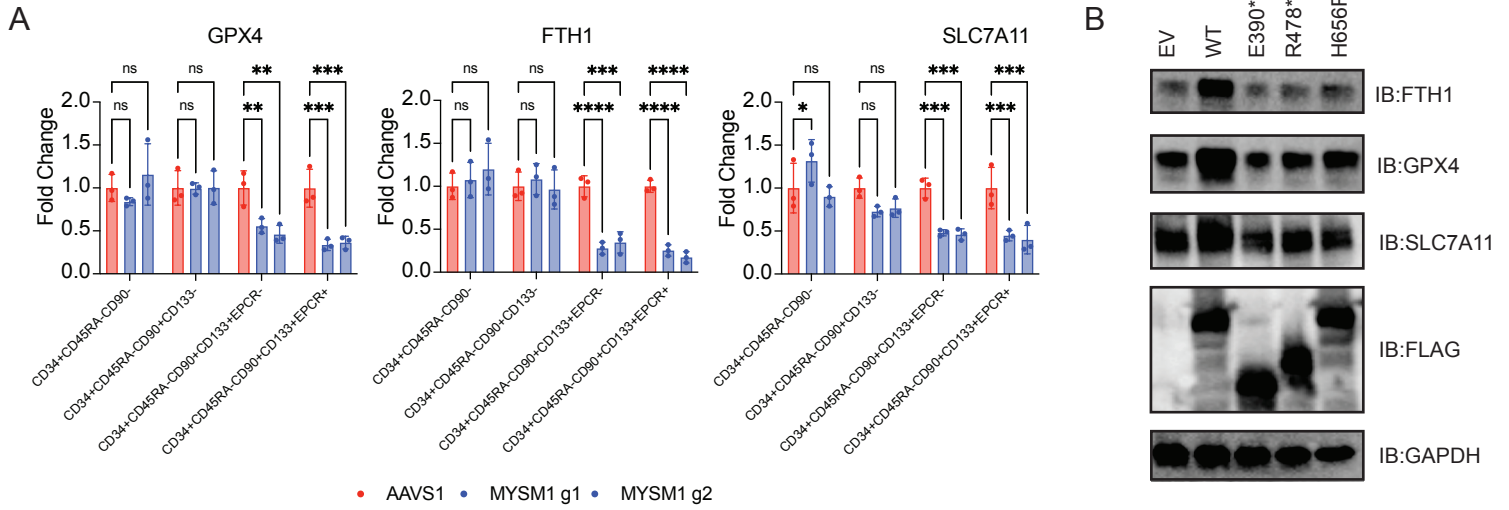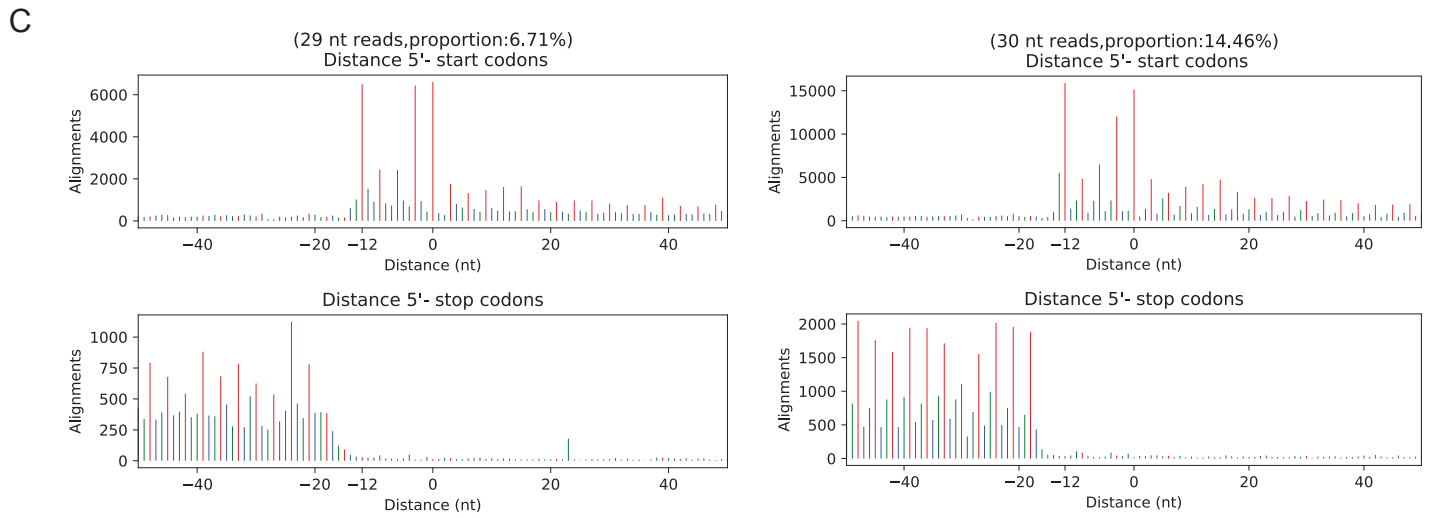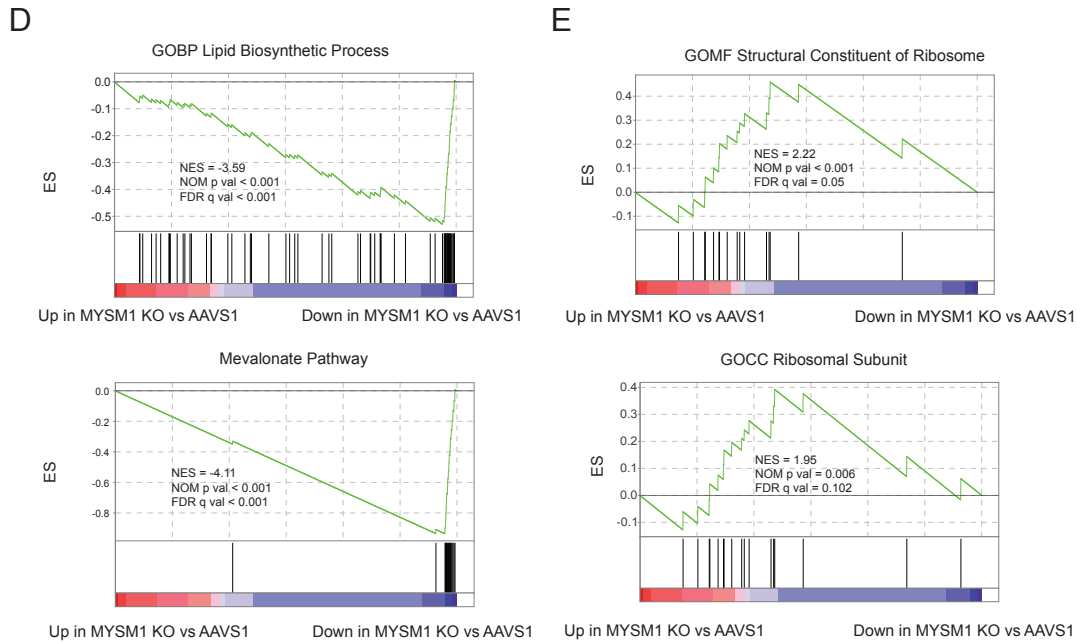

Supplement: NIHMS1866546-supplement-15.pdf [file NIHMS1866546-supplement-15.pdf]

Figure S7

A

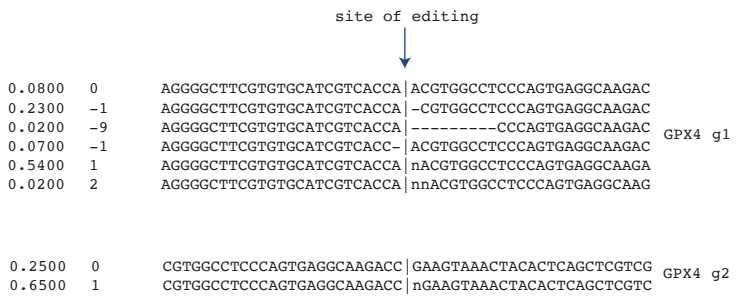

C

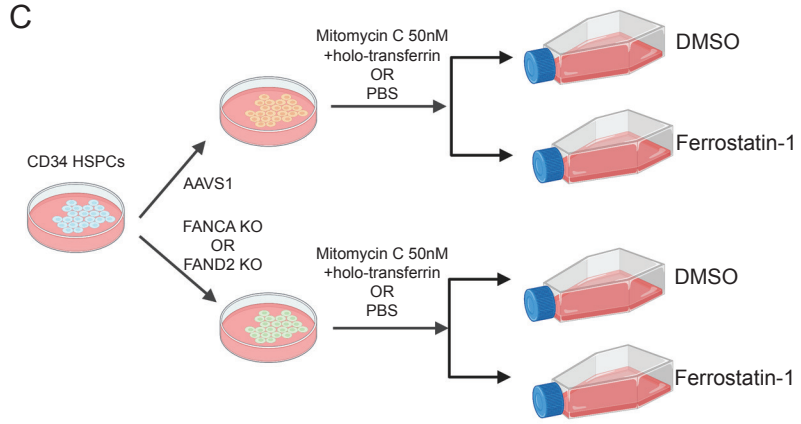

B

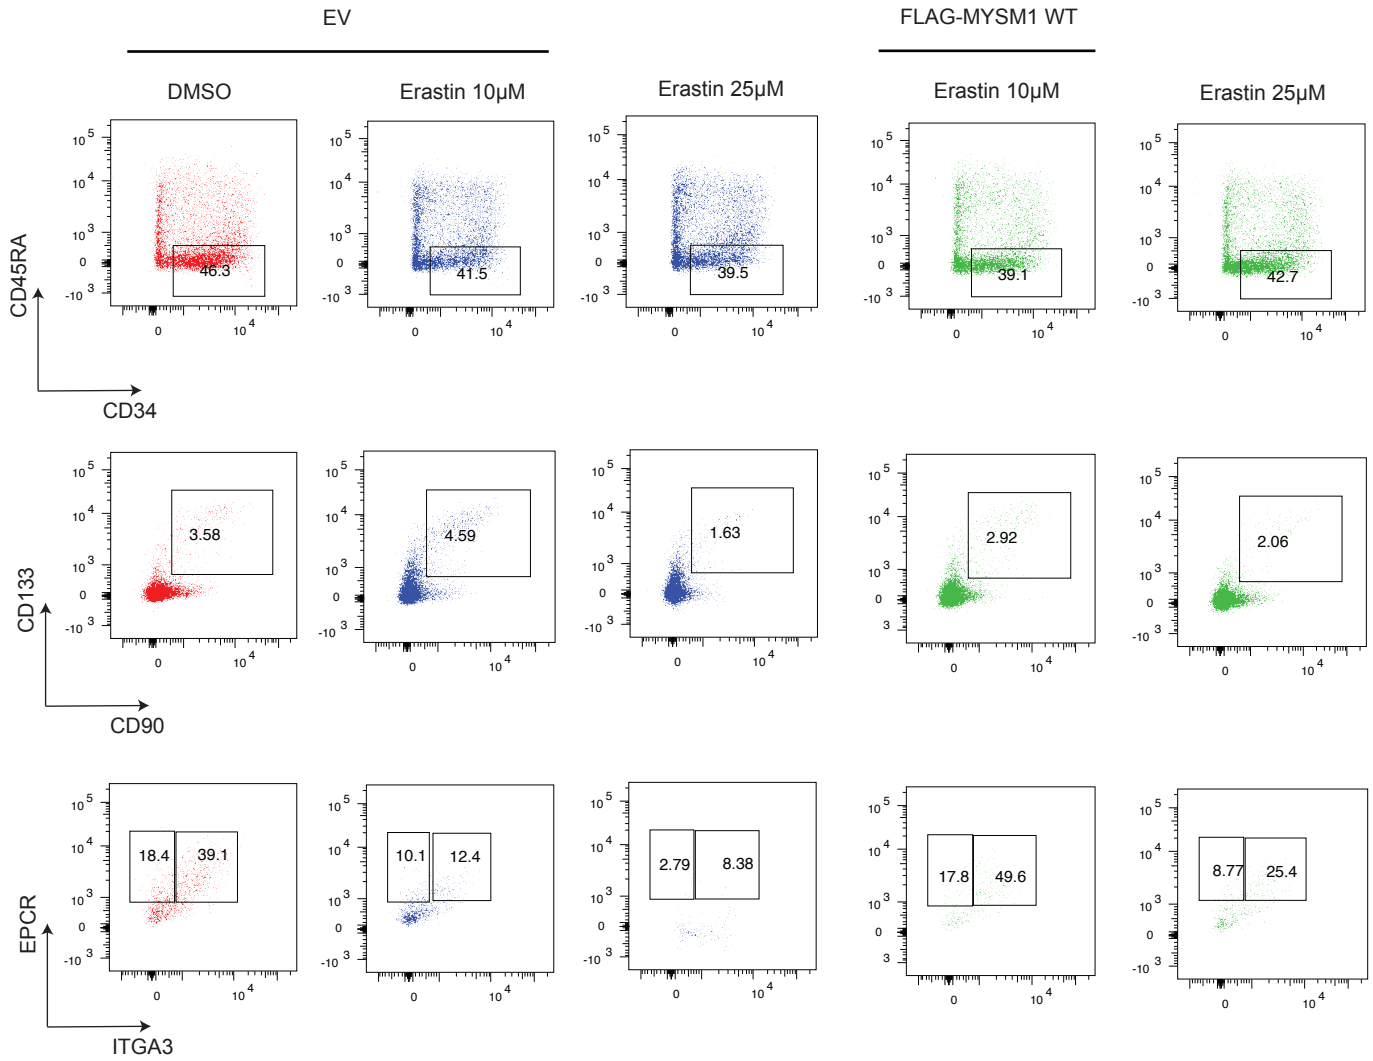

Supplement: NIHMS1866546-supplement-16.pdf [file NIHMS1866546-supplement-16.pdf]
